# Supplementary material
Source: Springer Nature journal article supplement (https://www.springermedizin.de/resource/supplementary/12874_2010_510_MOESM4_ESM.pdf/9432028)

**a) Data generating process 2**

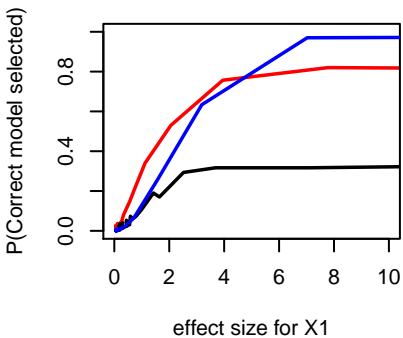

**b) Data generating process 3**

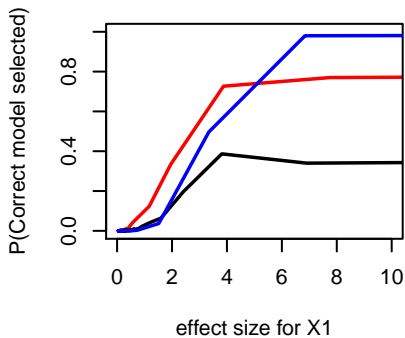

**c) Data generating process 4**

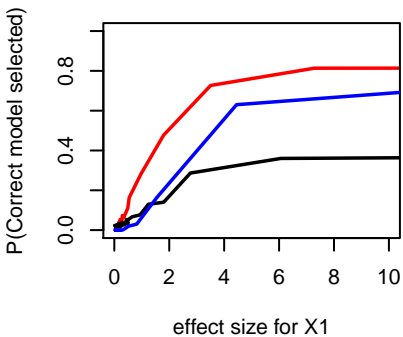

**d) Data generating process 5**

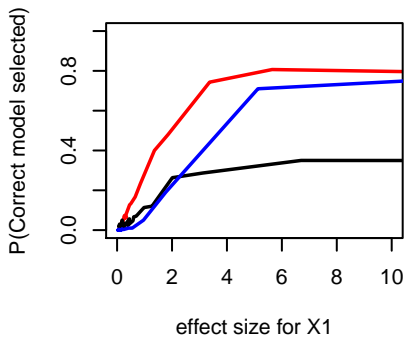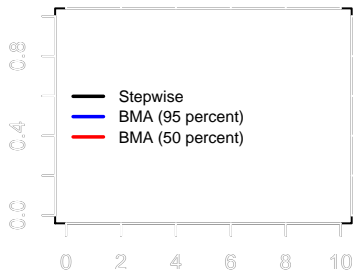

Supplement: MOESM4 [file 9432028]
